# Supplementary material for: Systematic Identification and Analysis of Acinetobacter baumannii Type VI Secretion System Effector and Immunity Components
Source: Front Microbiol. 2019 Oct 30;10:2440. doi: 10.3389/fmicb.2019.02440 (PMC6833914; doi:10.3389/fmicb.2019.02440)
Supplement: FILE S7 — A. baumannii predicted PAAR proteins. [file Data_Sheet_7.xlsx]

## Sheet: Sheet1
A_baumannii Strain	Identifier	Locus	Sequence	Length
6200	A	RU84_13240	MATPYITIGCPTTGGGQVISGNSLFLIDGIAVACVGDKATCPTHKIVATIVSGDPNMQIFGKAAARVNDSLSCGCKLLPKQHLVVQDNGGGSASSAANSSPAPMSQKQPTTDSFVKDEYENYYIEQNKTTMVPFKTMLMPYDQDRTNLFGVMSQIVSGACNFEVTHRVKKDQLFVTATLLPPTVRADATIIPRAVLRLFKKDKQISDTITLKVGKGYWNTANDKQPVGSCEIKLPAPDLEVIKAKLTMKYDAKFDGGVVVTSPPDVTYEFTITSAARRKA	280
3027STDY5784958	A	BAL062_02953	MATPYITIGCPTTGGGQVISGNSLFLIDGIAVACVGDKATCPTHKIVATIVSGDPNMQIFGKAAARVNDSLSCGCKLLPKQHLVVQDNGGGSASSAANSSPAPMSQKQPTTDSFVKDEYENYYIEQNKTTMVPFKTMLMPYDQDRTNLFGVMSQIVSGACNFEVTHRVKKDQLFVTATLLPPTVRADATIIPRAVLRLFKKDKQISDTITLKVGKGYWNTANDKQPVGSCEIKLPAPDLEVIKAKLTMKYDAKFDGGVVVTSPPDVTYEFTITSAARRKA	280
AB07	A	U476_04975	LATPYITIGCPTTGGGQVISGNSLFLIDGIAVACVGDKATCPTHKIVATIVSGDPNMQIFGKAAARVNDSLSCGCKLLPKQHLVVQDNGGGSASSAAKSSPAPMSQKQPTTDSFVKDEYENYYIEQNKTTMVPFKTMLMPYDQDRTNLFGVMSQIVSGACNFEVTHRVKKDQLFVTATLLPPTVRADATIIPRAVLRLFKKDKQISDTITLKVGKGYWNTANEKQPVGSCEIKLPAPDLEVIKAKLTMKYDAKFDGGVVVTSPPDVTYEFTITSAARRKA	280
AB34299	A	AXK18_03505	MATPYITIGCPTTGGGQVISGNSLFLIDGIAVACVGDKATCPTHKIVATIVSGDPNMQIFGKAAARVNDSLSCGCKLLPKQHLVVQDNGGGSASSAAKSSPAPMSQKQPTTDSFVKDEYENYYIEQNKTTMVPFKTMLMPYDQDRTNLFGVMSQIVSGACNFEVTHRVKKDQLFVTATLLPPTVRADATIIPRAVLRLFKKDKQISDTITLKVGKGYWNTANEKQPVGSCEIKLPAPDLEVIKAKLTMKYDAKFDGGVVVTSPPDVTYEFTITSAARRKA	280
Ab4568	A	CTZ19_14465	MATPYITIGCPTTGGGQVISGNSLFLIDGIAVACVGDKATCPTHKIVATIVSGDPNMQIFGKAAARVNDSLSCGCKLLPKQHLVVQDNGGGSASSAANSSPAPMSQKQPTTDSFVKDEYENYYIEQNKTTMVPFKTMLMPYDQDRTNLFGVMSQIVSGACNFEVTHRVKKDQLFVTATLLPPTVRADATIIPRAVLRLFKKDKQISDTITLKVGKGYWNTANDKQPVGSCEIKLPAPDLEVIKAKLTMKYDAKFDGGVVVTSPPDVTYEFTITSAARRKA	280
Ab4977	A	CTZ20_14235	MATPYITIGCPTTGGGQVISGNSLFLIDGIAVACVGDKATCPTHKIVATIVSGDPNMQIFGKAAARVNDSLSCGCKLLPKQHLVVQDNGGGSASSAANSSPAPMSQKQPTTDSFVKDEYENYYIEQNKTTMVPFKTMLMPYDQDRTNLFGVMSQIVSGACNFEVTHRVKKDQLFVTATLLPPTVRADATIIPRAVLRLFKKDKQISDTITLKVGKGYWNTANDKQPVGSCEIKLPAPDLEVIKAKLTMKYDAKFDGGVVVTSPPDVTYEFTITSAARRKA	280
AC29	A	BL01_00305	MATPYITIGCPTTGGGQVISGNSLFLIDGIAVACVGDKATCPTHKIVATIVSGDPNMQIFGKAAARVNDSLSCGCKLLPKQHLVVQDNGGGSASSAAKSSPAPMSQKQPTTDSFVKDEYENYYIEQNKTTMVPFKTMLMPYDQDRTNLFGVMSQIVSGACNFEVTHRVKKDQLFVTATLLPPTVRADATIIPRAVLRLFKKDKQISDTITLKVGKGYWNTANEKQPVGSCEIKLPAPDLEVIKAKLTMKYDAKFDGGVVVTSPPDVTYEFTITSAARRKA	280
AC30	A	B856_11870	MATPYITIGCPTTGGGQVISGNSLFLIDGIAVACVGDKATCPTHKIVATIVSGDPNMQIFGKAAARVNDSLSCGCKLLPKQHLVVQDNGGGSASSAAKSSPAPMSQKQPTTDSFVKDEYENYYIEQNKTTMVPFKTMLMPYDQDRTNLFGVMSQIVSGACNFEVTHRVKKDQLFVTATLLPPTVRADATIIPRAVLRLFKKDKQISDTITLKVGKGYWNTANEKQPVGSCEIKLPAPDLEVIKAKLTMKYDAKFDGGVVVTSPPDVTYEFTITSAARRKA	280
AF-673	A	BS065_14095	MATPYITIGCPTTGGGQVISGNSLFLIDGIAVACVGDKATCPTHKIVATIVSGDPNMQIFGKAAARVNDSLSCGCKLLPKQHLVVQDNGGGSASSAANSSPAPMSQKQPTTDSFVKDEYENYYIEQNKTTMVPFKTMLMPYDQDRTNLFGVMSQIVSGACNFEVTHRVKKDQLFVTATLLPPTVRADATIIPRAVLRLFKKDKQISDTITLKVGKGYWNTANDKQPVGSCEIKLPAPDLEVIKAKLTMKYDAKFDGGVVVTSPPDVTYEFTITSAARRKA	280
AR_0102	A	AM481_18325	MATPYITIGCPTTGGGQVISGNSLFLIDGIAVACVGDKATCPTHKIVATIVSGDPNMQIFGKAAARVNDSLSCGCKLLPKQHLVVQDNGGGSASSAANSSPAPMSQKQPTTDSFVKDEYENYYIEQNKTTMVPFKTMLMPYDQDRTNLFGVMSQIVSGACNFEVTHRVKKDQLFVTATLLPPTVRADATIIPRAVLRLFKKDKQISDTITLKVGKGYWNTANDKQPVGSCEIKLPAPDLEVIKAKLTMKYDAKFDGGVVVTSPPDVTYEFTITSAARRKA	280
BJAB07104	A	BJAB07104_01000	LATPYITIGCPTTGGGQVISGNSLFLIDGIAVACVGDKATCPTHKIVATIVSGDPNMQIFGKAAARVNDSLSCGCKLLPKQHLVVQDNGGGSASSAANSSPAPMSQKQPTTDSFVKDEYENYYIEQNKTTMVPFKTMLMPYDQDRTNLFGVMSQIVSGACNFEVTHRVKKDQLFVTATLLPPTVRADATIIPRAVLRLFKKDKQISDTITLKVGKGYWNTANDKQPVGSCEIKLPAPDLEVIKAKLTMKYDAKFDGGVVVTSPPDVTYEFTITSAARRKA	280
BJAB0715	A	BJAB0715_00984	LATPYITIGCPTTGGGQVISGNSLFLIDGIAVACVGDKATCPTHKIVATIVSGDPNMQIFGKAAARVNDSLSCGCKLLPKQHLVVQDNGGGSASSAANSSPAPMSQKQPTTDSFVKDEYENYYIEQNKTTMVPFKTMLMPYDQDRTNLFGVMSQIVSGACNFEVTHRVKKDQLFVTATLLPPTVRADATIIPRAVLRLFKKDKQISDTITLKVGKGYWNTANDKQPVGSCEIKLPAPDLEVIKAKLTMKYDAKFDGGVVVTSPPDVTYEFTITSAARRKA	280
BJAB0868	A	BJAB0868_01006	LATPYITIGCPTTGGGQVISGNSLFLIDGIAVACVGDKATCPTHKIVATIVSGDPNMQIFGKAAARVNDSLSCGCKLLPKQHLVVQDNGGGSASSAANSSPAPMSQKQPTTDSFVKDEYENYYIEQNKTTMVPFKTMLMPYDQDRTNLFGVMSQIVSGACNFEVTHRVKKDQLFVTATLLPPTVRADATIIPRAVLRLFKKDKQISDTITLKVGKGYWNTANDKQPVGSCEIKLPAPDLEVIKAKLTMKYDAKFDGGVVVTSPPDVTYEFTITSAARRKA	280
CBA7	A	B7L36_17250	MATPYITIGCPTTGGGQVISGNSLFLIDGIAVACVGDKATCPTHKIVATIVSGDPNMQIFGKAAARVNDSLSCGCKLLPKQHLVVQDNGGGSASSAANSSPAPMSQKQPTTDSFVKDEYENYYIEQNKTTMVPFKTMLMPYDQDRTNLFGVMSQIVSGACNFEVTHRVKKDQLFVTATLLPPTVRADATIIPRAVLRLFKKDKQISDTITLKVGKGYWNTANDKQPVGSCEIKLPAPDLEVIKAKLTMKYDAKFDGGVVVTSPPDVTYEFTITSAARRKA	280
CMC-CR-MDR-Ab4	A	AOT16_13820	MATPYITIGCPTTGGGQVISGNSLFLIDGIAVACVGDKATCPTHKIVATIVSGDPNMQIFGKAAARVNDSLSCGCKLLPKQHLVVQDNGGGSASSAANSSPAPMSQKQPTTDSFVKDEYENYYIEQNKTTMVPFKTMLMPYDQDRTNLFGVMSQIVSGACNFEVTHRVKKDQLFVTATLLPPTVRADATIIPRAVLRLFKKDKQISDTITLKVGKGYWNTANDKQPVGSCEIKLPAPDLEVIKAKLTMKYDAKFDGGVVVTSPPDVTYEFTITSAARRKA	280
CMC-CR-MDR-Ab66	A	AOT18_13800	MATPYITIGCPTTGGGQVISGNSLFLIDGIAVACVGDKATCPTHKIVATIVSGDPNMQIFGKAAARVNDSLSCGCKLLPKQHLVVQDNGGGSASSAANSSPAPMSQKQPTTDSFVKDEYENYYIEQNKTTMVPFKTMLMPYDQDRTNLFGVMSQIVSGACNFEVTHRVKKDQLFVTATLLPPTVRADATIIPRAVLRLFKKDKQISDTITLKVGKGYWNTANDKQPVGSCEIKLPAPDLEVIKAKLTMKYDAKFDGGVVVTSPPDVTYEFTITSAARRKA	280
CMC-MDR-Ab59	A	AOT17_13755	MATPYITIGCPTTGGGQVISGNSLFLIDGIAVACVGDKATCPTHKIVATIVSGDPNMQIFGKAAARVNDSLSCGCKLLPKQHLVVQDNGGGSASSAANSSPAPMSQKQPTTDSFVKDEYENYYIEQNKTTMVPFKTMLMPYDQDRTNLFGVMSQIVSGACNFEVTHRVKKDQLFVTATLLPPTVRADATIIPRAVLRLFKKDKQISDTITLKVGKGYWNTANDKQPVGSCEIKLPAPDLEVIKAKLTMKYDAKFDGGVVVTSPPDVTYEFTITSAARRKA	280
JBA13	A	B7L31_12215	MATPYITIGCPTTGGGQVISGNSLFLIDGIAVACVGDKATCPTHKIVATIVSGDPNMQIFGKAAARVNDSLSCGCKLLPKQHLVVQDNGGGSASSAANSSPAPMSQKQPTTDSFVKDEYENYYIEQNKTTMVPFKTMLMPYDQDRTNLFGVMSQIVSGACNFEVTHRVKKDQLFVTATLLPPTVRADATIIPRAVLRLFKKDKQISDTITLKVGKGYWNTANDKQPVGSCEIKLPAPDLEVIKAKLTMKYDAKFDGGVVVTSPPDVTYEFTITSAARRKA	280
KAB01	A	KAB01_01017	MATPYITIGCPTTGGGQVISGNSLFLIDGIAVACVGDKATCPTHKIVATIVSGDPNMQIFGKAAARVNDSLSCGCKLLPKQHLVVQDNGGGSASSAAKSSPAPMSQKQPTTDSFVKDEYENYYIEQNKTTMVPFKTMLMPYDQDRTNLFGVMSQIVSGACNFEVTHRVKKDQLFVTATLLPPTVRADATIIPRAVLRLFKKDKQISDTITLKVGKGYWNTANEKQPVGSCEIKLPAPDLEVIKAKLTMKYDAKFDGGVVVTSPPDVTYEFTITSAARRKA	280
KAB02	A	KAB02_01004	MATPYITIGCPTTGGGQVISGNSLFLIDGIAVACVGDKATCPTHKIVATIVSGDPNMQIFGKAAARVNDSLSCGCKLLPKQHLVVQDNGGGSASSAANSSPAPMSQKQPTTDSFVKDEYENYYIEQNKTTMVPFKTMLMPYDQDRTNLFGVMSQIVSGACNFEVTHRVKKDQLFVTATLLPPTVRADATIIPRAVLRLFKKDKQISDTITLKVGKGYWNTANDKQPVGSCEIKLPAPDLEVIKAKLTMKYDAKFDGGVVVTSPPDVTYEFTITSAARRKA	280
KAB03	A	KAB03_01046	MATPYITIGCPTTGGGQVISGNSLFLIDGIAVACVGDKATCPTHKIVATIVSGDPNMQIFGKAAARVNDSLSCGCKLLPKQHLVVQDNGGGSASSAAKSSPAPMSQKQPTTDSFVKDEYENYYIEQNKTTMVPFKTMLMPYDQDRTNLFGVMSQIVSGACNFEVTHRVKKDQLFVTATLLPPTVRADATIIPRAVLRLFKKDKQISDTITLKVGKGYWNTANEKQPVGSCEIKLPAPDLEVIKAKLTMKYDAKFDGGVVVTSPPDVTYEFTITSAARRKA	280
KAB04	A	KAB04_02873	MATPYITIGCPTTGGGQVISGNSLFLIDGIAVACVGDKATCPTHKIVATIVSGDPNMQIFGKAAARVNDSLSCGCKLLPKQHLVVQDNGGGSASSAANSSPAPMSQKQPTTDSFVKDEYENYYIEQNKTTMVPFKTMLMPYDQDRTNLFGVMSQIVSGACNFEVTHRVKKDQLFVTATLLPPTVRADATIIPRAVLRLFKKDKQISDTITLKVGKGYWNTANDKQPVGSCEIKLPAPDLEVIKAKLTMKYDAKFDGGVVVTSPPDVTYEFTITSAARRKA	280
KAB05	A	KAB05_01034	MATPYITIGCPTTGGGQVISGNSLFLIDGIAVACVGDKATCPTHKIVATIVSGDPNMQIFGKAAARVNDSLSCGCKLLPKQHLVVQDNGGGSASSAANSSPAPMSQKQPTTDSFVKDEYENYYIEQNKTTMVPFKTMLMPYDQDRTNLFGVMSQIVSGACNFEVTHRVKKDQLFVTATLLPPTVRADATIIPRAVLRLFKKDKQISDTITLKVGKGYWNTANDKQPVGSCEIKLPAPDLEVIKAKLTMKYDAKFDGGVVVTSPPDVTYEFTITSAARRKA	280
KAB06	A	KAB06_01015	MATPYITIGCPTTGGGQVISGNSLFLIDGIAVACVGDKATCPTHKIVATIVSGDPNMQIFGKAAARVNDSLSCGCKLLPKQHLVVQDNGGGSASSAANSSPAPMSQKQPTTDSFVKDEYENYYIEQNKTTMVPFKTMLMPYDQDRTNLFGVMSQIVSGACNFEVTHRVKKDQLFVTATLLPPTVRADATIIPRAVLRLFKKDKQISDTITLKVGKGYWNTANDKQPVGSCEIKLPAPDLEVIKAKLTMKYDAKFDGGVVVTSPPDVTYEFTITSAARRKA	280
KAB07	A	KAB07_01003	MATPYITIGCPTTGGGQVISGNSLFLIDGIAVACVGDKATCPTHKIVATIVSGDPNMQIFGKAAARVNDSLSCGCKLLPKQHLVVQDNGGGSASSAANSSPAPMSQKQPTTDSFVKDEYENYYIEQNKTTMVPFKTMLMPYDQDRTNLFGVMSQIVSGACNFEVTHRVKKDQLFVTATLLPPTVRADATIIPRAVLRLFKKDKQISDTITLKVGKGYWNTANDKQPVGSCEIKLPAPDLEVIKAKLTMKYDAKFDGGVVVTSPPDVTYEFTITSAARRKA	280
KAB08	A	KAB08_01000	MATPYITIGCPTTGGGQVISGNSLFLIDGIAVACVGDKATCPTHKIVATIVSGDPNMQIFGKAAARVNDSLSCGCKLLPKQHLVVQDNGGGSASSAANSSPAPMSQKQPTTDSFVKDEYENYYIEQNKTTMVPFKTMLMPYDQDRTNLFGVMSQIVSGACNFEVTHRVKKDQLFVTATLLPPTVRADATIIPRAVLRLFKKDKQISDTITLKVGKGYWNTANDKQPVGSCEIKLPAPDLEVIKAKLTMKYDAKFDGGVVVTSPPDVTYEFTITSAARRKA	280
LAC-4	A	ABLAC_28520	MATPYITIGCPTTGGGQVISGNSLFQIDGIPVACTGDKATCPTHKVVATIVSGDPCMQIFGKAAARVNDSLSCGCKLLPKQNLVVQDNGSGAASSAAKSSPAPMSQKQPATDSFVKDEYENYYIEQNKTTMVPFKTMLMPYDQDRTNLFGVMSQMVSGACNFEVTHQVKKDQLFVTATLLPPTVRADATIIPRAVLRLFKKDKQISDTITLKVGKGYWNTANDKQPVGSCEVKLPAPDLEVIKAKLTMKYDAKFDGGVVVTSPPDVTYEFTITSAARRKA	280
MDR-ZJ06	A	ABZJ_00996	MATPYITIGCPTTGGGQVISGNSLFLIDGIAVACVGDKATCPTHKIVATIVSGDPNMQIFGKAAARVNDSLSCGCKLLPKQHLVVQDNGGGSASSAANSSPAPMSQKQPTTDSFVKDEYENYYIEQNKTTMVPFKTMLMPYDQDRTNLFGVMSQIVSGACNFEVTHRVKKDQLFVTATLLPPTVRADATIIPRAVLRLFKKDKQISDTITLKVGKGYWNTANDKQPVGSCEIKLPAPDLEVIKAKLTMKYDAKFDGGVVVTSPPDVTYEFTITSAARRKA	280
SAA14	A	B7L45_14485	MATPYITIGCPTTGGGQVISGNSLFLIDGIAVACVGDKATCPTHKIVATIVSGDPNMQIFGKAAARVNDSLSCGCKLLPKQHLVVQDNGGGSASSAANSSPAPMSQKQPTTDSFVKDEYENYYIEQNKTTMVPFKTMLMPYDQDRTNLFGVMSQIVSGACNFEVTHRVKKDQLFVTATLLPPTVRADATIIPRAVLRLFKKDKQISDTITLKVGKGYWNTANDKQPVGSCEIKLPAPDLEVIKAKLTMKYDAKFDGGVVVTSPPDVTYEFTITSAARRKA	280
SSA12	A	B7L38_06350	MATPYITIGCPTTGGGQVISGNSLFLIDGIAVACVGDKATCPTHKIVATIVSGDPNMQIFGKAAARVNDSLSCGCKLLPKQHLVVQDNGGGSASSAANSSPAPMSQKQPTTDSFVKDEYENYYIEQNKTTMVPFKTMLMPYDQDRTNLFGVMSQIVSGACNFEVTHRVKKDQLFVTATLLPPTVRADATIIPRAVLRLFKKDKQISDTITLKVGKGYWNTANDKQPVGSCEIKLPAPDLEVIKAKLTMKYDAKFDGGVVVTSPPDVTYEFTITSAARRKA	280
SSMA17	A	B7L43_07120	MATPYITIGCPTTGGGQVISGNSLFLIDGIAVACVGDKATCPTHKIVATIVSGDPNMQIFGKAAARVNDSLSCGCKLLPKQHLVVQDNGGGSASSAANSSPAPMSQKQPTTDSFVKDEYENYYIEQNKTTMVPFKTMLMPYDQDRTNLFGVMSQIVSGACNFEVTHRVKKDQLFVTATLLPPTVRADATIIPRAVLRLFKKDKQISDTITLKVGKGYWNTANDKQPVGSCEIKLPAPDLEVIKAKLTMKYDAKFDGGVVVTSPPDVTYEFTITSAARRKA	280
TYTH-1	A	M3Q_1195	MATPYITIGCPTTGGGQVISGNSLFLIDGIAVACVGDKATCPTHKIVATIVSGDPNMQIFGKAAARVNDSLSCGCKLLPKQHLVVQDNGGGSASSAANSSPAPMSQKQPTTDSFVKDEYENYYIEQNKTTMVPFKTMLMPYDQDRTNLFGVMSQIVSGACNFEVTHRVKKDQLFVTATLLPPTVRADATIIPRAVLRLFKKDKQISDTITLKVGKGYWNTANDKQPVGSCEIKLPAPDLEVIKAKLTMKYDAKFDGGVVVTSPPDVTYEFTITSAARRKA	280
WKA02	A	B7L35_07295	MATPYITIGCPTTGGGQVISGNSLFLIDGIAVACVGDKATCPTHKIVATIVSGDPNMQIFGKAAARVNDSLSCGCKLLPKQHLVVQDNGGGSASSAANSSPAPMSQKQPTTDSFVKDEYENYYIEQNKTTMVPFKTMLMPYDQDRTNLFGVMSQIVSGACNFEVTHRVKKDQLFVTATLLPPTVRADATIIPRAVLRLFKKDKQISDTITLKVGKGYWNTANDKQPVGSCEIKLPAPDLEVIKAKLTMKYDAKFDGGVVVTSPPDVTYEFTITSAARRKA	280
XDR-BJ83	A	BS615_14090	MATPYITIGCPTTGGGQVISGNSLFLIDGIAVACVGDKATCPTHKIVATIVSGDPNMQIFGKAAARVNDSLSCGCKLLPKQHLVVQDNGGGSASSAANSSPAPMSQKQPTTDSFVKDEYENYYIEQNKTTMVPFKTMLMPYDQDRTNLFGVMSQIVSGACNFEVTHRVKKDQLFVTATLLPPTVRADATIIPRAVLRLFKKDKQISDTITLKVGKGYWNTANDKQPVGSCEIKLPAPDLEVIKAKLTMKYDAKFDGGVVVTSPPDVTYEFTITSAARRKA	280
XH386	A	TE32_14645	MATPYITIGCPTTGGGQVISGNSLFLIDGIAVACVGDKATCPTHKIVATIVSGDPNMQIFGKAAARVNDSLSCGCKLLPKQHLVVQDNGGGSASSAANSSPAPMSQKQPTTDSFVKDEYENYYIEQNKTTMVPFKTMLMPYDQDRTNLFGVMSQIVSGACNFEVTHRVKKDQLFVTATLLPPTVRADATIIPRAVLRLFKKDKQISDTITLKVGKGYWNTANDKQPVGSCEIKLPAPDLEVIKAKLTMKYDAKFDGGVVVTSPPDVTYEFTITSAARRKA	280
XH856	A	AYR70_13775	MATPYITIGCPTTGGGQVISGNSLFLIDGIAVACVGDKATCPTHKIVATIVSGDPNMQIFGKAAARVNDSLSCGCKLLPKQHLVVQDNGGGSASSAANSSPAPMSQKQPTTDSFVKDEYENYYIEQNKTTMVPFKTMLMPYDQDRTNLFGVMSQIVSGACNFEVTHRVKKDQLFVTATLLPPTVRADATIIPRAVLRLFKKDKQISDTITLKVGKGYWNTANDKQPVGSCEIKLPAPDLEVIKAKLTMKYDAKFDGGVVVTSPPDVTYEFTITSAARRKA	280
XH857	A	AYR69_04880	MATPYITIGCPTTGGGQVISGNSLFLIDGIAVACVGDKATCPTHKIVATIVSGDPNMQIFGKAAARVNDSLSCGCKLLPKQHLVVQDNGGGSASSAANSSPAPMSQKQPTTDSFVKDEYENYYIEQNKTTMVPFKTMLMPYDQDRTNLFGVMSQIVSGACNFEVTHRVKKDQLFVTATLLPPTVRADATIIPRAVLRLFKKDKQISDTITLKVGKGYWNTANDKQPVGSCEIKLPAPDLEVIKAKLTMKYDAKFDGGVVVTSPPDVTYEFTITSAARRKA	280
XH858	A	AZE33_05030	MATPYITIGCPTTGGGQVISGNSLFLIDGIAVACVGDKATCPTHKIVATIVSGDPNMQIFGKAAARVNDSLSCGCKLLPKQHLVVQDNGGGSASSAANSSPAPMSQKQPTTDSFVKDEYENYYIEQNKTTMVPFKTMLMPYDQDRTNLFGVMSQIVSGACNFEVTHRVKKDQLFVTATLLPPTVRADATIIPRAVLRLFKKDKQISDTITLKVGKGYWNTANDKQPVGSCEIKLPAPDLEVIKAKLTMKYDAKFDGGVVVTSPPDVTYEFTITSAARRKA	280
XH859	A	AYR68_04275	MATPYITIGCPTTGGGQVISGNSLFLIDGIAVACVGDKATCPTHKIVATIVSGDPNMQIFGKAAARVNDSLSCGCKLLPKQHLVVQDNGGGSASSAANSSPAPMSQKQPTTDSFVKDEYENYYIEQNKTTMVPFKTMLMPYDQDRTNLFGVMSQIVSGACNFEVTHRVKKDQLFVTATLLPPTVRADATIIPRAVLRLFKKDKQISDTITLKVGKGYWNTANDKQPVGSCEIKLPAPDLEVIKAKLTMKYDAKFDGGVVVTSPPDVTYEFTITSAARRKA	280
15A34	B	B7L42_08945	MTTPYITIGCPTSGGGQVISGNNMFLIDGIPVACVGDKATCPTHKVVATIVSGDPCMQIFGKAAARVNDSLSCGCKLLPQQNLVVQDNGGGAASSAAKSSSAPISQKQPATDSFVKDEYENYYIEQNTTKYVKFTNGIFPYDEDKKNLFGAISQAVSGVCTFIVTYILKGQELFVTVSMLPPTLSGDATIFPYATLDLVHNNQSLGKTRLEKGKGVWSTENSKEPVGQCKVTLPKPDLSTIEATLTMGYTAKFDGGTVRPNPPHTRFSFTLNSASRRKS	279
15A5	B	B6S64_03225	MTTPYITIGCPTSGGGQVISGNNMFLIDGIPVACVGDKATCPTHKVVATIVSGDPCMQIFGKAAARVNDSLSCGCKLLPQQNLVVQDNGGGAASSAAKSSSAPISQKQPATDSFVKDEYENYYIEQNTTKYVKFTNGIFPYDEDKKNLFGAISQAVSGVCTFIVTYILKGQELFVTVSMLPPTLSGDATIFPYATLDLVHNNQSLGKTRLEKGKGVWSTENSKEPVGQCKVTLPKPDLSTIEATLTMGYTAKFDGGTVRPNPPHTRFSFTLNSASRRKS	279
1656-2	B	ABK1_2293	LTTPYITIGCPTSGGGQVISGNNMFLIDGIPVACVGDKATCPTHKVVATIVSGDPCMQIFGKAAARVNDSLSCGCKLLPQQNLVVQDNGGGAASSAAKSSSAPISQKQPATDSFVKDEYENYYIEQNTTKYVKFTNGIFPYDEDKKNLFGAISQAVSGVCTFIVTYILKGQELFVTVSMLPPTLSGDATIFPYATLDLVHNNQSLGKTRLEKGKGVWSTENSKEPVGQCKVTLPKPDLSTIEATLTMGYTAKFDGGTVRPNPPHTRFSFTLNSASRRKS	279
3027STDY5784958	B	BAL062_01888	MTTPYITIGCPTSGGGQVISGNNMFLIDGIPVACVGDKATCPTHKVVATIVSGDPCMQIFGKAAARVNDSLSCGCKLLPQQNLVVQDNGGGAASSAAKSSSAPISQKQPATDSFVKDEYENYYIEQNTTKYVKFTNGIFPYDEDKKNLFGAISQAVSGVCTFIVTYILKGQELFVTVSMLPPTLSGDATIFPYATLDLVHNNQSLGKTRLEKGKGVWSTENSKEPVGQCKVTLPKPDLSTIEATLTMGYTAKFDGGTVRPNPPHTRFSFTLNSASRRKS	279
AB34299	B	AXK18_17045	MTTPYITIGCPTSGGGQVISGNNMFLIDGIPVACVGDKATCPTHKVVATIVSGDPCMQIFGKAAARVNDSLSCGCKLLPQQNLVVQDNGGGAASSAAKSSSAPISQKQPATDSFVKDEYENYYIEQNTTKYVKFTNGIFPYDEDKKNLFGAISQAVSGVCTFIVTYILKGQELFVTVSMLPPTLSGDATIFPYATLDLVHNNQSLGKTRLEKGKGVWSTENSKEPVGQCKVTLPKPDLSTIEATLTMGYTAKFDGGTVRPNPPHTRFSFTLNSASRRKS	279
Ab4568	B	CTZ19_09360	MTTPYITIGCPTSGGGQVISGNNMFLIDGIPVACVGDKATCPTHKVVATIVSGDPCMQIFGKAAARVNDSLSCGCKLLPQQNLVVQDNGGGAASSAAKSSSAPISQKQPATDSFVKDEYENYYIEQNTTKYVKFTNGIFPYDEDKKNLFGAISQAVSGVCTFIVTYILKGQELFVTVSMLPPTLSGDATIFPYATLDLVHNNQSLGKTRLEKGKGVWSTENSKEPVGQCKVTLPKPDLSTIEATLTMGYTAKFDGGTVRPNPPHTRFSFTLNSASRRKS	279
Ab4653	B	CTZ18_09325	MTTPYITIGCPTSGGGQVISGNNMFLIDGIPVACVGDKATCPTHKVVATIVSGDPCMQIFGKAAARVNDSLSCGCKLLPQQNLVVQDNGGGAASSAAKSSSAPISQKQPATDSFVKDEYENYYIEQNTTKYVKFTNGIFPYDEDKKNLFGAISQAVSGVCTFIVTYILKGQELFVTVSMLPPTLSGDATIFPYATLDLVHNNQSLGKTRLEKGKGVWSTENSKEPVGQCKVTLPKPDLSTIEATLTMGYTAKFDGGTVRPNPPHTRFSFTLNSASRRKS	279
Ab4977	B	CTZ20_09130	MTTPYITIGCPTSGGGQVISGNNMFLIDGIPVACVGDKATCPTHKVVATIVSGDPCMQIFGKAAARVNDSLSCGCKLLPQQNLVVQDNGGGAASSAAKSSSAPISQKQPATDSFVKDEYENYYIEQNTTKYVKFTNGIFPYDEDKKNLFGAISQAVSGVCTFIVTYILKGQELFVTVSMLPPTLSGDATIFPYATLDLVHNNQSLGKTRLEKGKGVWSTENSKEPVGQCKVTLPKPDLSTIEATLTMGYTAKFDGGTVRPNPPHTRFSFTLNSASRRKS	279
AbPK1	B	CTI08_11235	MTTPYITIGCPTSGGGQVISGNNMFLIDGIPVACVGDKATCPTHKVVATIVSGDPCMQIFGKAAARVNDSLSCGCKLLPQQNLVVQDNGGGAASSAAKSSSAPISQKQPATDSFVKDEYENYYIEQNTTKYVKFTNGIFPYDEDKKNLFGAISQAVSGVCTFIVTYILKGQELFVTVSMLPPTLSGDATIFPYATLDLVHNNQSLGKTRLEKGKGVWSTENSKEPVGQCKVTLPKPDLSTIEATLTMGYTAKFDGGTVRPNPPHTRFSFTLNSASRRKS	279
AC29	B	BL01_12525	MTTPYITIGCPTSGGGQVISGNNMFLIDGIPVACVGDKATCPTHKVVATIVSGDPCMQIFGKAAARVNDSLSCGCKLLPQQNLVVQDNGGGAASSAAKSSSAPISQKQPATDSFVKDEYENYYIEQNTTKYVKFTNGIFPYDEDKKNLFGAISQAVSGVCTFIVTYILKGQELFVTVSMLPPTLSGDATIFPYATLDLVHNNQSLGKTRLEKGKGVWSTENSKEPVGQCKVTLPKPDLSTIEATLTMGYTAKFDGGTVRPNPPHTRFSFTLNSASRRKS	279
AC30	B	B856_07810	LTTPYITIGCPTSGGGQVISGNNMFLIDGIPVACVGDKATCPTHKVVATIVSGDPCMQIFGKAAARVNDSLSCGCKLLPQQNLVVQDNGGGAASSAAKSSSAPISQKQPATDSFVKDEYENYYIEQNTTKYVKFTNGIFPYDEDKKNLFGAISQAVSGVCTFIVTYILKGQELFVTVSMLPPTLSGDATIFPYATLDLVHNNQSLGKTRLEKGKGVWSTENSKEPVGQCKVTLPKPDLSTIEATLTMGYTAKFDGGTVRPNPPHTRFSFTLNSASRRKS	279
ACICU	B	ACICU_01834	LTTPYITIGCPTSGGGQVISGNNMFLIDGIPVACVGDKATCPTHKVVATIVSGDPCMQIFGKAAARVNDSLSCGCKLLPQQNLVVQDNGGGAASSAAKSSSAPISQKQPATDSFVKDEYENYYIEQNTTKYVKFTNGIFPYDEDKKNLFGAISQAVSGVCTFIVTYILKGQELFVTVSMLPPTLSGDATIFPYATLDLVHNNQSLGKTRLEKGKGVWSTENSKEPVGQCKVTLPKPDLSTIEATLTMGYTAKFDGGTVRPNPPHTRFSFTLNSASRRKS	279
AF-673	B	BS065_09195	MTTPYITIGCPTSGGGQVISGNNMFLIDGIPVACVGDKATCPTHKVVATIVSGDPCMQIFGKAAARVNDSLSCGCKLLPQQNLVVQDNGGGAASSAAKSSSAPISQKQPATDSFVKDEYENYYIEQNTTKYVKFTNGIFPYDEDKKNLFGAISQAVSGVCTFIVTYILKGQELFVTVSMLPPTLSGDATIFPYATLDLVHNNQSLGKTRLEKGKGVWSTENSKEPVGQCKVTLPKPDLSTIEATLTMGYTAKFDGGTVRPNPPHTRFSFTLNSASRRKS	279
AR_0056	B	C7R87_1439	MTTPYITIGCPTSGGGQVISGNNMFLIDGIPVACVGDKATCPTHKVVATIVSGDPCMQIFGKAAARVNDSLSCGCKLLPQQNLVVQDNGGGAASSAAKSSSAPISQKQPATDSFVKDEYENYYIEQNTTKYVKFTNGIFPYDEDKKNLFGAISQAVSGVCTFIVTYILKGQELFVTVSMLPPTLSGDATIFPYATLDLVHNNQSLGKTRLEKGKGVWSTENSKEPVGQCKVTLPKPDLSTIEATLTMGYTAKFDGGTVRPNPPHTRFSFTLNSASRRKS	279
AR_0102	B	AM481_13655	MTTPYITIGCPTSGGGQVISGNNMFLIDGIPVACVGDKATCPTHKVVATIVSGDPCMQIFGKAAARVNDSLSCGCKLLPQQNLVVQDNGGGAASSAAKSSSAPISQKQPATDSFVKDEYENYYIEQNTTKYVKFTNGIFPYDEDKKNLFGAISQAVSGVCTFIVTYILKGQELFVTVSMLPPTLSGDATIFPYATLDLVHNNQSLGKTRLEKGKGVWSTENSKEPVGQCKVTLPKPDLSTIEATLTMGYTAKFDGGTVRPNPPHTRFSFTLNSASRRKS	279
AYP-A2	B	AYP_001929	MTTPYITIGCPTSGGGQVISGNNMFLIDGIPVACVGDKATCPTHKVVATIVSGDPCMQIFGKAAARVNDSLSCGCKLLPQQNLVVQDNGGGAASSAAKSSSAPISQKQPATDSFVKDEYENYYIEQNTTKYVKFTNGIFPYDEDKKNLFGAISQAVSGVCTFIVTYILKGQELFVTVSMLPPTLSGDATIFPYATLDLVHNNQSLGKTRLEKGKGVWSTENSKEPVGQCKVTLPKPDLSTIEATLTMGYTAKFDGGTVRPNPPHTRFSFTLNSASRRKS	279
BJAB07104	B	BJAB07104_01904	LTTPYITIGCPTSGGGQVISGNNMFLIDGIPVACVGDKATCPTHKVVATIVSGDPCMQIFGKAAARVNDSLSCGCKLLPQQNLVVQDNGGGAASSAAKSSSAPISQKQPATDSFVKDEYENYYIEQNTTKYVKFTNGIFPYDEDKKNLFGAISQAVSGVCTFIVTYILKGQELFVTVSMLPPTLSGDATIFPYATLDLVHNNQSLGKTRLEKGKGVWSTENSKEPVGQCKVTLPKPDLSTIEATLTMGYTAKFDGGTVRPNPPHTRFSFTLNSASRRKS	279
BJAB0868	B	BJAB0868_01973	LTTPYITIGCPTSGGGQVISGNNMFLIDGIPVACVGDKATCPTHKVVATIVSGDPCMQIFGKAAARVNDSLSCGCKLLPQQNLVVQDNGGGAASSAAKSSSAPISQKQPATDSFVKDEYENYYIEQNTTKYVKFTNGIFPYDEDKKNLFGAISQAVSGVCTFIVTYILKGQELFVTVSMLPPTLSGDATIFPYATLDLVHNNQSLGKTRLEKGKGVWSTENSKEPVGQCKVTLPKPDLSTIEATLTMGYTAKFDGGTVRPNPPHTRFSFTLNSASRRKS	279
CBA7	B	B7L36_11840	MTTPYITIGCPTSGGGQVISGNNMFLIDGIPVACVGDKATCPTHKVVATIVSGDPCMQIFGKAAARVNDSLSCGCKLLPQQNLVVQDNGGGAASSAAKSSSAPISQKQPATDSFVKDEYENYYIEQNTTKYVKFTNGIFPYDEDKKNLFGAISQAVSGVCTFIVTYILKGQELFVTVSMLPPTLSGDATIFPYATLDLVHNNQSLGKTRLEKGKGVWSTENSKEPVGQCKVTLPKPDLSTIEATLTMGYTAKFDGGTVRPNPPHTRFSFTLNSASRRKS	279
CMC-CR-MDR-Ab4	B	AOT16_08985	MTTPYITIGCPTSGGGQVISGNNMFLIDGIPVACVGDKATCPTHKVVATIVSGDPCMQIFGKAAARVNDSLSCGCKLLPQQNLVVQDNGGGAASSAAKSSSAPISQKQPATDSFVKDEYENYYIEQNTTKYVKFTNGIFPYDEDKKNLFGAISQAVSGVCTFIVTYILKGQELFVTVSMLPPTLSGDATIFPYATLDLVHNNQSLGKTRLEKGKGVWSTENSKEPVGQCKVTLPKPDLSTIEATLTMGYTAKFDGGTVRPNPPHTRFSFTLNSASRRKS	279
CMC-CR-MDR-Ab66	B	AOT18_08965	MTTPYITIGCPTSGGGQVISGNNMFLIDGIPVACVGDKATCPTHKVVATIVSGDPCMQIFGKAAARVNDSLSCGCKLLPQQNLVVQDNGGGAASSAAKSSSAPISQKQPATDSFVKDEYENYYIEQNTTKYVKFTNGIFPYDEDKKNLFGAISQAVSGVCTFIVTYILKGQELFVTVSMLPPTLSGDATIFPYATLDLVHNNQSLGKTRLEKGKGVWSTENSKEPVGQCKVTLPKPDLSTIEATLTMGYTAKFDGGTVRPNPPHTRFSFTLNSASRRKS	279
CMC-MDR-Ab59	B	AOT17_08960	MTTPYITIGCPTSGGGQVISGNNMFLIDGIPVACVGDKATCPTHKVVATIVSGDPCMQIFGKAAARVNDSLSCGCKLLPQQNLVVQDNGGGAASSAAKSSSAPISQKQPATDSFVKDEYENYYIEQNTTKYVKFTNGIFPYDEDKKNLFGAISQAVSGVCTFIVTYILKGQELFVTVSMLPPTLSGDATIFPYATLDLVHNNQSLGKTRLEKGKGVWSTENSKEPVGQCKVTLPKPDLSTIEATLTMGYTAKFDGGTVRPNPPHTRFSFTLNSASRRKS	279
DU202	B	DU202_02137	MTTPYITIGCPTSGGGQVISGNNMFLIDGIPVACVGDKATCPTHKVVATIVSGDPCMQIFGKAAARVNDSLSCGCKLLPQQNLVVQDNGGGAASSAAKSSSAPISQKQPATDSFVKDEYENYYIEQNTTKYVKFTNGIFPYDEDKKNLFGAISQAVSGVCTFIVTYILKGQELFVTVSMLPPTLSGDATIFPYATLDLVHNNQSLGKTRLEKGKGVWSTENSKEPVGQCKVTLPKPDLSTIEATLTMGYTAKFDGGTVRPNPPHTRFSFTLNSASRRKS	279
HRAB-85	B	BKJ37_09165	MTTPYITIGCPTSGGGQVISGNNMFLIDGIPVACVGDKATCPTHKVVATIVSGDPCMQIFGKAAARVNDSLSCGCKLLPQQNLVVQDNGGGAASSAAKSSSAPISQKQPATDSFVKDEYENYYIEQNTTKYVKFTNGIFPYDEDKKNLFGAISQAVSGVCTFIVTYILKGQELFVTVSMLPPTLSGDATIFPYATLDLVHNNQSLGKTRLEKGKGVWSTENSKEPVGQCKVTLPKPDLSTIEATLTMGYTAKFDGGTVRPNPPHTRFSFTLNSASRRKS	279
JBA13	B	B7L31_07600	MTTPYITIGCPTSGGGQVISGNNMFLIDGIPVACVGDKATCPTHKVVATIVSGDPCMQIFGKAAARVNDSLSCGCKLLPQQNLVVQDNGGGAASSAAKSSSAPISQKQPATDSFVKDEYENYYIEQNTTKYVKFTNGIFPYDEDKKNLFGAISQAVSGVCTFIVTYILKGQELFVTVSMLPPTLSGDATIFPYATLDLVHNNQSLGKTRLEKGKGVWSTENSKEPVGQCKVTLPKPDLSTIEATLTMGYTAKFDGGTVRPNPPHTRFSFTLNSASRRKS	279
KAB01	B	KAB01_02003	MTTPYITIGCPTSGGGQVISGNNMFLIDGIPVACVGDKATCPTHKVVATIVSGDPCMQIFGKAAARVNDSLSCGCKLLPQQNLVVQDNGGGAASSAAKSSSAPISQKQPATDSFVKDEYENYYIEQNTTKYVKFTNGIFPYDEDKKNLFGAISQAVSGVCTFIVTYILKGQELFVTVSMLPPTLSGDATIFPYATLDLVHNNQSLGKTRLEKGKGVWSTENSKEPVGQCKVTLPKPDLSTIEATLTMGYTAKFDGGTVRPNPPHTRFSFTLNSASRRKS	279
KAB02	B	KAB02_01933	MTTPYITIGCPTSGGGQVISGNNMFLIDGIPVACVGDKATCPTHKVVATIVSGDPCMQIFGKAAARVNDSLSCGCKLLPQQNLVVQDNGGGAASSAAKSSSAPISQKQPATDSFVKDEYENYYIEQNTTKYVKFTNGIFPYDEDKKNLFGAISQAVSGVCTFIVTYILKGQELFVTVSMLPPTLSGDATIFPYATLDLVHNNQSLGKTRLEKGKGVWSTENSKEPVGQCKVTLPKPDLSTIEATLTMGYTAKFDGGTVRPNPPHTRFSFTLNSASRRKS	279
KAB03	B	KAB03_01586	MTTPYITIGCPTSGGGQVISGNNMFLIDGIPVACVGDKATCPTHKVVATIVSGDPCMQIFGKAAARVNDSLSCGCKLLPQQNLVVQDNGGGAASSAAKSSSAPISQKQPATDSFVKDEYENYYIEQNTTKYVKFTNGIFPYDEDKKNLFGAISQAVSGVCTFIVTYILKGQELFVTVSMLPPTLSGDATIFPYATLDLVHNNQSLGKTRLEKGKGVWSTENSKEPVGQCKVTLPKPDLSTIEATLTMGYTAKFDGGTVRPNPPHTRFSFTLNSASRRKS	279
KAB04	B	KAB04_01942	MTTPYITIGCPTSGGGQVISGNNMFLIDGIPVACVGDKATCPTHKVVATIVSGDPCMQIFGKAAARVNDSLSCGCKLLPQQNLVVQDNGGGAASSAAKSSSAPISQKQPATDSFVKDEYENYYIEQNTTKYVKFTNGIFPYDEDKKNLFGAISQAVSGVCTFIVTYILKGQELFVTVSMLPPTLSGDATIFPYATLDLVHNNQSLGKTRLEKGKGVWSTENSKEPVGQCKVTLPKPDLSTIEATLTMGYTAKFDGGTVRPNPPHTRFSFTLNSASRRKS	279
KAB05	B	KAB05_01981	MTTPYITIGCPTSGGGQVISGNNMFLIDGIPVACVGDKATCPTHKVVATIVSGDPCMQIFGKAAARVNDSLSCGCKLLPQQNLVVQDNGGGAASSAAKSSSAPISQKQPATDSFVKDEYENYYIEQNTTKYVKFTNGIFPYDEDKKNLFGAISQAVSGVCTFIVTYILKGQELFVTVSMLPPTLSGDATIFPYATLDLVHNNQSLGKTRLEKGKGVWSTENSKEPVGQCKVTLPKPDLSTIEATLTMGYTAKFDGGTVRPNPPHTRFSFTLNSASRRKS	279
KAB06	B	KAB06_01946	MTTPYITIGCPTSGGGQVISGNNMFLIDGIPVACVGDKATCPTHKVVATIVSGDPCMQIFGKAAARVNDSLSCGCKLLPQQNLVVQDNGGGAASSAAKSSSAPISQKQPATDSFVKDEYENYYIEQNTTKYVKFTNGIFPYDEDKKNLFGAISQAVSGVCTFIVTYILKGQELFVTVSMLPPTLSGDATIFPYATLDLVHNNQSLGKTRLEKGKGVWSTENSKEPVGQCKVTLPKPDLSTIEATLTMGYTAKFDGGTVRPNPPHTRFSFTLNSASRRKS	279
KAB07	B	KAB07_01930	MTTPYITIGCPTSGGGQVISGNNMFLIDGIPVACVGDKATCPTHKVVATIVSGDPCMQIFGKAAARVNDSLSCGCKLLPQQNLVVQDNGGGAASSAAKSSSAPISQKQPATDSFVKDEYENYYIEQNTTKYVKFTNGIFPYDEDKKNLFGAISQAVSGVCTFIVTYILKGQELFVTVSMLPPTLSGDATIFPYATLDLVHNNQSLGKTRLEKGKGVWSTENSKEPVGQCKVTLPKPDLSTIEATLTMGYTAKFDGGTVRPNPPHTRFSFTLNSASRRKS	279
KAB08	B	KAB08_01933	MTTPYITIGCPTSGGGQVISGNNMFLIDGIPVACVGDKATCPTHKVVATIVSGDPCMQIFGKAAARVNDSLSCGCKLLPQQNLVVQDNGGGAASSAAKSSSAPISQKQPATDSFVKDEYENYYIEQNTTKYVKFTNGIFPYDEDKKNLFGAISQAVSGVCTFIVTYILKGQELFVTVSMLPPTLSGDATIFPYATLDLVHNNQSLGKTRLEKGKGVWSTENSKEPVGQCKVTLPKPDLSTIEATLTMGYTAKFDGGTVRPNPPHTRFSFTLNSASRRKS	279
KBN10P02143	B	KBNAB1_1966	MTTPYITIGCPTSGGGQVISGNNMFLIDGIPVACVGDKATCPTHKVVATIVSGDPCMQIFGKAAARVNDSLSCGCKLLPQQNLVVQDNGGGAASSAAKSSSAPISQKQPATDSFVKDEYENYYIEQNTTKYVKFTNGIFPYDEDKKNLFGAISQAVSGVCTFIVTYILKGQELFVTVSMLPPTLSGDATIFPYATLDLVHNNQSLGKTRLEKGKGVWSTENSKEPVGQCKVTLPKPDLSTIEATLTMGYTAKFDGGTVRPNPPHTRFSFTLNSASRRKS	279
MDR-TJ	B	ABTJ_01870	LTTPYITIGCPTSGGGQVISGNNMFLIDGIPVACVGDKATCPTHKVVATIVSGDPCMQIFGKAAARVNDSLSCGCKLLPQQNLVVQDNGGGAASSAAKSSSAPISQKQPATDSFVKDEYENYYIEQNTTKYVKFTNGIFPYDEDKKNLFGAISQAVSGVCTFIVTYILKGQELFVTVSMLPPTLSGDATIFPYATLDLVHNNQSLGKTRLEKGKGVWSTENSKEPVGQCKVTLPKPDLSTIEATLTMGYTAKFDGGTVRPNPPHTRFSFTLNSASRRKS	279
MDR-ZJ06	B	ABZJ_02014	LTTPYITIGCPTSGGGQVISGNNMFLIDGIPVACVGDKATCPTHKVVATIVSGDPCMQIFGKAAARVNDSLSCGCKLLPQQNLVVQDNGGGAASSAAKSSSAPISQKQPATDSFVKDEYENYYIEQNTTKYVKFTNGIFPYDEDKKNLFGAISQAVSGVCTFIVTYILKGQELFVTVSMLPPTLSGDATIFPYATLDLVHNNQSLGKTRLEKGKGVWSTENSKEPVGQCKVTLPKPDLSTIEATLTMGYTAKFDGGTVRPNPPHTRFSFTLNSASRRKS	279
NCGM237	B	AB237_1703	LTTPYITIGCPTSGGGQVISGNNMFLIDGIPVACVGDKATCPTHKVVATIVSGDPCMQIFGKAAARVNDSLSCGCKLLPQQNLVVQDNGGGAASSAAKSSSAPISQKQPATDSFVKDEYENYYIEQNTTKYVKFTNGIFPYDEDKKNLFGAISQAVSGVCTFIVTYILKGQELFVTVSMLPPTLSGDATIFPYATLDLVHNNQSLGKTRLEKGKGVWSTENSKEPVGQCKVTLPKPDLSTIEATLTMGYTAKFDGGTVRPNPPHTRFSFTLNSASRRKS	279
SAA14	B	B7L45_09870	MTTPYITIGCPTSGGGQVISGNNMFLIDGIPVACVGDKATCPTHKVVATIVSGDPCMQIFGKAAARVNDSLSCGCKLLPQQNLVVQDNGGGAASSAAKSSSAPISQKQPATDSFVKDEYENYYIEQNTTKYVKFTNGIFPYDEDKKNLFGAISQAVSGVCTFIVTYILKGQELFVTVSMLPPTLSGDATIFPYATLDLVHNNQSLGKTRLEKGKGVWSTENSKEPVGQCKVTLPKPDLSTIEATLTMGYTAKFDGGTVRPNPPHTRFSFTLNSASRRKS	279
SMC_Paed_Ab_BL01	B	CV094_00535	MTTPYITIGCPTSGGGQVISGNNMFLIDGIPVACVGDKATCPTHKVVATIVSGDPCMQIFGKAAARVNDSLSCGCKLLPQQNLVVQDNGGGAASSAAKSSSAPISQKQPATDSFVKDEYENYYIEQNTTKYVKFTNGIFPYDEDKKNLFGAISQAVSGVCTFIVTYILKGQELFVTVSMLPPTLSGDATIFPYATLDLVHNNQSLGKTRLEKGKGVWSTENSKEPVGQCKVTLPKPDLSTIEATLTMGYTAKFDGGTVRPNPPHTRFSFTLNSASRRKS	279
SSA12	B	B7L38_01670	MTTPYITIGCPTSGGGQVISGNNMFLIDGIPVACVGDKATCPTHKVVATIVSGDPCMQIFGKAAARVNDSLSCGCKLLPQQNLVVQDNGGGAASSAAKSSSAPISQKQPATDSFVKDEYENYYIEQNTTKYVKFTNGIFPYDEDKKNLFGAISQAVSGVCTFIVTYILKGQELFVTVSMLPPTLSGDATIFPYATLDLVHNNQSLGKTRLEKGKGVWSTENSKEPVGQCKVTLPKPDLSTIEATLTMGYTAKFDGGTVRPNPPHTRFSFTLNSASRRKS	279
SSA6	B	B7L40_15335	MTTPYITIGCPTSGGGQVISGNNMFLIDGIPVACVGDKATCPTHKVVATIVSGDPCMQIFGKAAARVNDSLSCGCKLLPQQNLVVQDNGGGAASSAAKSSSAPISQKQPATDSFVKDEYENYYIEQNTTKYVKFTNGIFPYDEDKKNLFGAISQAVSGVCTFIVTYILKGQELFVTVSMLPPTLSGDATIFPYATLDLVHNNQSLGKTRLEKGKGVWSTENSKEPVGQCKVTLPKPDLSTIEATLTMGYTAKFDGGTVRPNPPHTRFSFTLNSASRRKS	279
SSMA17	B	B7L43_02965	MTTPYITIGCPTSGGGQVISGNNMFLIDGIPVACVGDKATCPTHKVVATIVSGDPCMQIFGKAAARVNDSLSCGCKLLPQQNLVVQDNGGGAASSAAKSSSAPISQKQPATDSFVKDEYENYYIEQNTTKYVKFTNGIFPYDEDKKNLFGAISQAVSGVCTFIVTYILKGQELFVTVSMLPPTLSGDATIFPYATLDLVHNNQSLGKTRLEKGKGVWSTENSKEPVGQCKVTLPKPDLSTIEATLTMGYTAKFDGGTVRPNPPHTRFSFTLNSASRRKS	279
TCDC-AB0715	B	ABTW07_2047	LTTPYITIGCPTSGGGQVISGNNMFLIDGIPVACVGDKATCPTHKVVATIVSGDPCMQIFGKAAARVNDSLSCGCKLLPQQNLVVQDNGGGAASSAAKSSSAPISQKQPATDSFVKDEYENYYIEQNTTKYVKFTNGIFPYDEDKKNLFGAISQAVSGVCTFIVTYILKGQELFVTVSMLPPTLSGDATIFPYATLDLVHNNQSLGKTRLEKGKGVWSTENSKEPVGQCKVTLPKPDLSTIEATLTMGYTAKFDGGTVRPNPPHTRFSFTLNSASRRKS	279
USA2	B	B7L39_05390	MTTPYITIGCPTSGGGQVISGNNMFLIDGIPVACVGDKATCPTHKVVATIVSGDPCMQIFGKAAARVNDSLSCGCKLLPQQNLVVQDNGGGAASSAAKSSSAPISQKQPATDSFVKDEYENYYIEQNTTKYVKFTNGIFPYDEDKKNLFGAISQAVSGVCTFIVTYILKGQELFVTVSMLPPTLSGDATIFPYATLDLVHNNQSLGKTRLEKGKGVWSTENSKEPVGQCKVTLPKPDLSTIEATLTMGYTAKFDGGTVRPNPPHTRFSFTLNSASRRKS	279
WCHAB005133	B	C5B74_09330	MTTPYITIGCPTSGGGQVISGNNMFLIDGIPVACVGDKATCPTHKVVATIVSGDPCMQIFGKAAARVNDSLSCGCKLLPQQNLVVQDNGGGAASSAAKSSSAPISQKQPATDSFVKDEYENYYIEQNTTKYVKFTNGIFPYDEDKKNLFGAISQAVSGVCTFIVTYILKGQELFVTVSMLPPTLSGDATIFPYATLDLVHNNQSLGKTRLEKGKGVWSTENSKEPVGQCKVTLPKPDLSTIEATLTMGYTAKFDGGTVRPNPPHTRFSFTLNSASRRKS	279
XDR-BJ83	B	BS615_09530	MTTPYITIGCPTSGGGQVISGNNMFLIDGIPVACVGDKATCPTHKVVATIVSGDPCMQIFGKAAARVNDSLSCGCKLLPQQNLVVQDNGGGAASSAAKSSSAPISQKQPATDSFVKDEYENYYIEQNTTKYVKFTNGIFPYDEDKKNLFGAISQAVSGVCTFIVTYILKGQELFVTVSMLPPTLSGDATIFPYATLDLVHNNQSLGKTRLEKGKGVWSTENSKEPVGQCKVTLPKPDLSTIEATLTMGYTAKFDGGTVRPNPPHTRFSFTLNSASRRKS	279
XH386	B	TE32_09210	MTTPYITIGCPTSGGGQVISGNNMFLIDGIPVACVGDKATCPTHKVVATIVSGDPCMQIFGKAAARVNDSLSCGCKLLPQQNLVVQDNGGGAASSAAKSSSAPISQKQPATDSFVKDEYENYYIEQNTTKYVKFTNGIFPYDEDKKNLFGAISQAVSGVCTFIVTYILKGQELFVTVSMLPPTLSGDATIFPYATLDLVHNNQSLGKTRLEKGKGVWSTENSKEPVGQCKVTLPKPDLSTIEATLTMGYTAKFDGGTVRPNPPHTRFSFTLNSASRRKS	279
XH857	B	AYR69_08885	MTTPYITIGCPTSGGGQVISGNNMFLIDGIPVACVGDKATCPTHKVVATIVSGDPCMQIFGKAAARVNDSLSCGCKLLPQQNLVVQDNGGGAASSAAKSSSAPISQKQPATDSFVKDEYENYYIEQNTTKYVKFTNGIFPYDEDKKNLFGAISQAVSGVCTFIVTYILKGQELFVTVSMLPPTLSGDATIFPYATLDLVHNNQSLGKTRLEKGKGVWSTENSKEPVGQCKVTLPKPDLSTIEATLTMGYTAKFDGGTVRPNPPHTRFSFTLNSASRRKS	279
XH859	B	AYR68_08635	MTTPYITIGCPTSGGGQVISGNNMFLIDGIPVACVGDKATCPTHKVVATIVSGDPCMQIFGKAAARVNDSLSCGCKLLPQQNLVVQDNGGGAASSAAKSSSAPISQKQPATDSFVKDEYENYYIEQNTTKYVKFTNGIFPYDEDKKNLFGAISQAVSGVCTFIVTYILKGQELFVTVSMLPPTLSGDATIFPYATLDLVHNNQSLGKTRLEKGKGVWSTENSKEPVGQCKVTLPKPDLSTIEATLTMGYTAKFDGGTVRPNPPHTRFSFTLNSASRRKS	279
XH860	B	AYR67_08975	MTTPYITIGCPTSGGGQVISGNNMFLIDGIPVACVGDKATCPTHKVVATIVSGDPCMQIFGKAAARVNDSLSCGCKLLPQQNLVVQDNGGGAASSAAKSSSAPISQKQPATDSFVKDEYENYYIEQNTTKYVKFTNGIFPYDEDKKNLFGAISQAVSGVCTFIVTYILKGQELFVTVSMLPPTLSGDATIFPYATLDLVHNNQSLGKTRLEKGKGVWSTENSKEPVGQCKVTLPKPDLSTIEATLTMGYTAKFDGGTVRPNPPHTRFSFTLNSASRRKS	279
YU-R612	B	AXA63_08190	MTTPYITIGCPTSGGGQVISGNNMFLIDGIPVACVGDKATCPTHKVVATIVSGDPCMQIFGKAAARVNDSLSCGCKLLPQQNLVVQDNGGGAASSAAKSSSAPISQKQPATDSFVKDEYENYYIEQNTTKYVKFTNGIFPYDEDKKNLFGAISQAVSGVCTFIVTYILKGQELFVTVSMLPPTLSGDATIFPYATLDLVHNNQSLGKTRLEKGKGVWSTENSKEPVGQCKVTLPKPDLSTIEATLTMGYTAKFDGGTVRPNPPHTRFSFTLNSASRRKS	279
A1268	C	BS103_09060	MATPYITIGCPTTGGGQVISGNSMFLIDGIPIACVGDKATCPTHKVVATIVSGDPNMQIFGKAAARVNDSLSCGCKLLPQQNLVVQDNGGAASSGAKSSSAPMSQKQQTTDSFREEKYENYYIEQYKTDVYISHKAVLLGDEGVTPLDGAVSYFLNYKVQGKELFLSVVINAAPLSHKGTVYPFGTAIVSREGKEIARTKLKSDQGYWPTDKNKAPLGSCTIKLPEPNLQLVDVELELGYTAVISDTVGSVHPMPPIKKYKFSLNSAARKV	271
AB030	C	IX87_20215	MATPYITIGCPTTGGGQVISGNSMFLIDGIPVACVGDKATCPTHKVVATIVSGDPNMQIFGKAAARVNDSLSCGCKLLPQQNLVVQDNGGGAASSASKSSSAPISQKQQTTDSFREEKYENYYIEQYKTDVYISHKAVLLGDEGVTPLDGAVSYFLNYKVQGKELFLSVVINAAPLSHKGTVYPFGTAIVSREGKEIARTKLKSDQGYWPTDKNKAPLGSCTIKLPEPNLQLVDVELELGYTAVISDTVGSVHPMPPIKKYKFSLNSAARKV	272
AB042	C	AT570_RS16595	MATPYITIGCPTTGGGQVISGNSMFLIDGIPVACVGDKATCPTHKVVATIVSGDPNMQIFGKAAARVNDSLSCGCKLLPQQNLVVQDNGGAASSGAKSSSAPMSQKQQTTDSFREEKYENYYIEQYKTDVYISHKAVLLGDEGVTPLDGAVSYFLNYKVQGKELFLSVVINAAPLSHKGTVYPFGTAIVSREGKEIARTKLKSDQGYWPTDKNKAPLGSCTIKLPEPNLQLVDVELELGYTAVISDTVGSVHPMPPIKKYKFSLNSAARKV	271
AB307-0294	C	ABBFA_002520	MATPYITIGCPTSGGGQVISGNSMFLIDGIAVACVGDKATCPTHKVVATIISGDPNMQIFGKAAARVNDSLSCGCKLLPQQNLVVQDNGGAASSGAKSSTAPMSQKQQTTNSFREEKYENYYIEQYKTDVYISHKAVLLGDEGVTPLDGAVSYFLNYKVQGKELFLSVVINAAPLSHKGTVYPFGTAIVSREGKEITRAKLKSDKGYWPTDKNKAPLGSCTIKLPEPNLQLVDVELELGYTAVISDTVGSVHPMPPIKKYKFSLNSAARKV	271
AbH12O-A2	C	LX00_09495	LATPYITIGCPTTGGGQVISGNSMFLIDGIPVACVGDKATCPTHKVVATIVSGDPNMQIFGKAAARVNDSLSCGCKLLPQQNLVVQDNGGGAASSASKSSSAPISQKQQTTDSFREEKYENYYIEQYKTDVYISHKAVLLGDEGVTPLDGAVSYFLNYKVQGKELFLSVVINAAPLSHKGTVYPFGTAIVSREGKEIARTKLKSDQGYWPTDKNKAPLGSCTIKLPEPNLQLVDVELELGYTAVISDTVGSVHPMPPIKKYKFSLNSAARKV	272
AF-401	C	BS064_10335	MATPYITIGCPTTGGGQVISGNSMFLIDGIPVACVGDKATCPTHKVVATIVSGDPNMQIFGKAAARVNDSLSCGCKLLPQQNLVVQDNGGGAASSASKSSSAPISQKQQTTDSFREEKYENYYIEQYKTDVYISHKAVLLGDEGVTPLDGAVSYFLNYKVQGKELFLSVVINAAPLSHKGTVYPFGTAIVSREGKEIARTKLKSDQGYWPTDKNKAPLGSCTIKLPEPNLQLVDVELELGYTAVISDTVGSVHPMPPIKKYKFSLNSAARKV	272
AR_0063	C	AM442_12120	MATPYITIGCPTTGGGQVISGNSMFLIDGIPVACVGDKATCPTHKVVATIVSGDPNMQIFGKAAARVNDSLSCGCKLLPQQNLVVQDNGGGAASSASKSSSAPISQKQQTTDSFREEKYENYYIEQYKTDVYISHKAVLLGDEGVTPLDGAVSYFLNYKVQGKELFLSVVINAAPLSHKGTVYPFGTAIVSREGKEIARTKLKSDQGYWPTDKNKAPLGSCTIKLPEPNLQLVDVELELGYTAVISDTVGSVHPMPPIKKYKFSLNSAARKV	272
AR_0078	C	AM457_12810	MATPYITIGCPTTGGGQVISGNSMFLIDGIPVACVGDKATCPTHKVVATIVSGDPNMQIFGKAAARVNDSLSCGCKLLPQQNLVVQDNGGAASSGAKSSSAPMSQKQQTTDSFREEKYENYYIEQYKTDVYISHKAVLLGDEGVTPLDGAVSYFLNYKVQGKELFLSVVINAAPLSHKGTVYPFGTAIVSREGKEIARTKLKSDQGYWPTDKNKAPLGSCTIKLPEPNLQLVDVELELGYTAVISDTVGSVHPMPPIKKYKFSLNSAARKV	271
AR_0101	C	AM480_16765	MATPYITIGCPTTGGGQVISGNSMFLIDGIPVACVGDKATCPTHKVVATIVSGDPNMQIFGKAAARVNDSLSCGCKLLPQQNLVVQDNGGGAASSASKSSSAPISQKQQTTDSFREEKYENYYIEQYKTDVYISHKAVLLGDEGVTPLDGAVSYFLNYKVQGKELFLSVVINAAPLSHKGTVYPFGTAIVSREGKEIARTKLKSDQGYWPTDKNKAPLGSCTIKLPEPNLQLVDVELELGYTAVISDTVGSVHPMPPIKKYKFSLNSAARKV	272
ATCC17978-mff	C	ACX60_09070	MATPYITIGCPTTGGGQVISGNSMFLIDGIPVACVGDKATCPTHKVVATIVSGDPNMQIFGKAAARVNDSLSCGCKLLPQQNLVVQDNGGAASSGAKSSSAPMSQKQQTTDSFREEKYENYYIEQYKTDVYISHKAVLLGDEGVTPLDGAVSYFLNYKVQGKELFLSVVINAAPLSHKGTVYPFGTAIVSREGKEIARTKLKSDQGYWPTDKNKAPLGSCTIKLPEPNLQLVDVELELGYTAVISDTVGSVHPMPPIKKYKFSLNSAARKV	271
SDF	D	ABSDF0708	MGNLFVRAGDGHMCPKCKCWSVVIKSHDHMIMDGKPVAYAGDKLTCGATIQPQQSHVVGDSVSPYSYASTTSQSLSPQNQLTTNSFVKDEYENYYIDNSKEERVEFKNFLFPYDQDKGNLIGIIAQGVSGKCTFVVNRKNQNTSLFVSVTLLPPVLKNDAKIYPKASIQLLKKGKPLGPIEPMPIGKGFWNTEKDMQPVGSIELTLPPPDLEPVTVKLRLSYTGWIDGGQVVPNPSYINHEFTITSAARRKA	252
6200	E	RU84_13195	MAKGFAIHNAITDHGGVIPSTQSRSSQMGNLFVRAGDGHMCPKCRCWSVVIKSHDHVIFDGKPVAYAGDKLSCGATIQPQQSHVVGESGSPYSGKDSNTQSQKYDEQLKITFNDETDELLKYFDCRVKIGENFRNANLDITGKTNRFYTEGKEPITEIELILKDNIIYFDEL	172
A1268	F	BS103_04545	MAKGFAIHNAITDHGGVIPSTQSRSSQMGNLFVRAGDGHMCPKCRCWSVVIKSHDHIIMDGKPVAYAGDKLSCGATIQPQQSHVVGDSGSPYSAKETTQKNNFVENNIEKKVTEITWSYGNNFNPLSDKSRFFNDLNIHVKTTGYSQGENVSISIEPENSDISTFEPFAITIKVDSNGEGILKDVFSGKTLIIDTEY	197
B8342	G	AB895_2431	MATPYITIGCPTSGGGQVISGNSMFLIDGIPVACVGDKATCPTHKVVATIVSGDPYMQIFGKAAARVNDSLSCGCKLLPQQNLVVQDNGGGSAQSSPVSKAQTQDSFVENKSKDIHKIQFKLVDDETKKPLTELMYEIYSKDKGQLLVQGYTDKSGLTALYESNYTAESVEVILVDLSKPIEPI	184
ACICU	H	ACICU_02147	MAKSFAINMAPTNHGGVVPATQSRTSQEGNLFVRAGDGHMCPKCKCWSVVIKSHDHVIMDGKPVAYVGDKLSCGATIMPQQFHVVGDSGSPYSSAASSAAPVQNSLVEDKSNEIHKVQFKLVDVDTDQPLSAMLYEIHSKESGKLLVQGYTDKNGMTAIYESEHTPESVQLITVDLSKPLDPL	183
SDF	H	ABSDF3422	MSKSFAVHMAPTNHGGMIPATQSRSSQQGNLFVRAGDGHMCPKCKCWSVVIKSHDHVIFDGKPVAYVGDSLSCGAKIVLQQFHVVGDSGSPYSSAASSTAPVQDSLVEDKSNEIHKVQFKLVDVDTNQPLSAMLYEIHSKDSGKLLVQGYTDKNGMTAIYESEHTPESVQLITVDLSKPLDPL	183
AB030	I	IX87_01040	MATPYITIGCPTSGGGQVISGNSMFLIDGIPVACVGDKATCPTHKVVATIVSGDPYMQIFGKAAARVNDSLSCGCKLLPQQNLVVQDNGGGSAQSLPASKAQTQDSFVEDKSKEYGIQFQLKDEKTQKVFSEIPYSIIYKKDGKVETGWTDKEGKTHVINADSPDEVEFQTIDASKPLPPL	181
AR_0088	I	AM467_05035	MATPYITIGCPTSGGGQVISGNSMFLIDGIPVACVGDKATCPTHKVVATIVSGDPYMQIFGKAAARVNDSLSCGCKLLPQQNLVVQDNGGGSAQSLPASKAQTQDSFVEDKSKEYGIQFQLKDEKTQKVFSEIPYSIIYKKDGKVETGWTDKEGKTHVINADSPDEVEFQTIDASKPLPPL	181
HWBA8	I	B7L46_13550	MATPYITIGCPTSGGGQVISGNSMFLIDGIPVACVGDKATCPTHKVVATIVSGDPYMQIFGKAAARVNDSLSCGCKLLPQQNLVVQDNGGGSAQSLPASKAQTQDSFVEDKSKEYGIQFQLKDEKTQKVFSEIPYSIIYKKDGKVETGWTDKEGKTHVINADSPDEVEFQTIDASKPLPPL	181
15A34	J	B7L42_07410	MATPYITIGCPTTGGGQVISGNSMFLIDGIPVACVGDKATCPTHKVVATIVSGDPYMQIFGKAAARVNDSLSCGCKLLPQQNLVVQDNGGGAVQGSQASNATQDSFMPQTDEHGIKFQLKDQETGKPLAQQYFKLKGPDGSEIEGFTDKNGFTELIKTGTEAKEIDLTTFDLSQPMAKWE	180
A388	J	A388_02651	MATPYITIGCPTTGGGQVISGNSMFLIDGIPVACVGDKATCPTHKVVATIVSGDPYMQIFGKAAARVNDSLSCGCKLLPQQNLVVQDNGGGAVQGSQASNATQDSFMPQTDEHGIKFQLKDQETGKPLAQQYFKLQGPDGSEIEGFTDENGFTELIKTGTEAKEIDLTTFDLSQPMAKWE	180
A85	J	CBI29_01272	MATPYITIGCPTTGGGQVISGNSMFLIDGIPVACVGDKATCPTHKVVATIVSGDPYMQIFGKAAARVNDSLSCGCKLLPQQNLVVQDNGGGAVQGSQASNATQDSFMPQTDEHGIKFQLKDQETGKPLAQQYFKLQGPDGSEIEGFTDENGFTELIKTGTEAKEIDLTTFDLSQPMAKWE	180
AB0057	J	AB57_1303	MATPYITIGCPTTGGGQVISGNSMFLIDGIPVACVGDKATCPTHKVVATIVSGDPYMQIFGKAAARVNDSLSCGCKLLPQQNLVVQDNGGGAVQGSQASNATQDSFMPQTDEHGIKFQLKDQETGKPLAQQYFKLQGPDGSEIEGFTDENGFTELIKTGTEAKEIDLTTFDLSQPMAKWE	180
SDF	K	ABSDF1814	MKGFAIHNAITDHGGIIPSTQMRTSQMGNLFVRAGDGHMCPKCKCWSVVIKSHDHIIMDGKPVAYAGDKLSCGATIQPQQSHVVGDSGSPYSYAASSAAPAQDSFVEEKKEYGIQFQLKDEKTQKIFSDIPYSIIYKKDGKIETGWTDKEGKTHVINAATPDEVEFQTIDASKPLPPL	178
ab736	L	A4U85_14235	MAKGFAIHNAITDHGGVIPSTQAISSQMGNLFVRAGDGHMCPKCRCWSVVIKSHDHVIFDGKPVAYVGDKLSCGATIQPQQSHVVGESGSPYSRSSDNTNNSSFVPTLQYGQRFLLQDELTGEPLSNICYEIEKGGNIIHGKTDENGFTDLITSENKEEIQIHIIYEEHDHG	172
ATCC19606	L	HMPREF0010_01438	MAKGFAIHNAITDHGGVIPSTQAISSQMGNLFVRAGDGHMCPKCRCWSVVIKSHDHVIFDGKPVAYVGDKLSCGATIQPQQSHVVGESGSPYSRSSDNTNNSSFVPTLQYGQRFLLQDELTGEPLSNICYEIEKGGNIIHGKTDENGFTDLITSENKEEIQIHIIYEEHDHG	172
3207	M	Aba3207_18125	MASPYITIGCPTTGGGQVISGNSAFLIDGIAIACVGDKATCPAHKTVSTIVSGDPNMQVMGKAAARVNDSLSCGCKLLPKQSLVNQG	87
15A34	M	B7L42_11360	MASPYITIGCPTTGGGQVISGNSAFLIEGIAIACVGDKATCPAHKTVSTIVSGDPNMQVMGKAAARVNDSLSCGCKLLPKQSLVNQG	87
1656-2	M	ABK1_1754	MASPYITIGCPTTGGGQVISGNSAFLIEGIAIACVGDKATCPAHKTVSTIVSGDPNMQVMGKAAARVNDSLSCGCKLLPKQSLVNQG	87
A1	M	ABA1_01414	MASPYITIGCPTTGGGQVISGNSAFLIEGIAIACVGDKATCPAHKTVSTIVSGDPNMQVMGKAAARVNDSLSCGCKLLPKQSLVNQG	87
A388	M	A388_02465	MASPYITIGCPTTGGGQVISGNSAFLIEGIAIACVGDKATCPAHKTVSTIVSGDPNMQVMGKAAARVNDSLSCGCKLLPKQSLVNQG	87
A85	M	CBI29_01455	MASPYITIGCPTTGGGQVISGNSAFLIEGIAIACVGDKATCPAHKTVSTIVSGDPNMQVMGKAAARVNDSLSCGCKLLPKQSLVNQG	87
AB0057	M	AB57_1489	MASPYITIGCPTTGGGQVISGNSAFLIEGIAIACVGDKATCPAHKTVSTIVSGDPNMQVMGKAAARVNDSLSCGCKLLPKQSLVNQG	87
AB030	M	IX87_03925	MASPYITIGCPTTGGGQVISGNSAFLIDGIAIACVGDKATCPAHKTVSTIVSGDPNMQVMGKAAARVNDSLSCGCKLLPKQSLVNQG	87
AB042	M	AT570_RS14015	MASPYITIGCPTTGGGQVISGNSAFLIDGIAIACVGDKATCPAHKTVSTIVSGDPNMQVMGKAAARVNDSLSCGCKLLPKQSLVNQG	87
Ab04-mff	M	ACX61_11765	MASPYITIGCPTTGGGQVISGNSAFLIDGIAIACVGDKATCPAHKTVSTIVSGDPNMQVMGKAAARVNDSLSCGCKLLPKQSLVNQG	87
AB07	M	U476_07190	MASPYITIGCPTTGGGQVISGNSAFLIEGIAIACVGDKATCPAHKTVSTIVSGDPNMQVMGKAAARVNDSLSCGCKLLPKQSLVNQG	87
AB307-0294	M	ABBFA_002229	MASPYITIGCPTTGGGQVISGNSAFLIEGIAIACVGDKATCPAHKTVSTIVSGDPNMQVMGKAAARVNDSLSCGCKLLPKQSLVNQG	87
AB34299	M	AXK18_01360	MASPYITIGCPTTGGGQVISGNSAFLIEGIAIACVGDKATCPAHKTVSTIVSGDPNMQVMGKAAARVNDSLSCGCKLLPKQSLVNQG	87
Ab4653	M	CTZ18_11980	MASPYITIGCPTTGGGQVISGNSAFLIEGIAIACVGDKATCPAHKTVSTIVSGDPNMQVMGKAAARVNDSLSCGCKLLPKQSLVNQG	87
AB5075-UW	M	ABUW_2570	MASPYITIGCPTTGGGQVISGNSAFLIEGIAIACVGDKATCPAHKTVSTIVSGDPNMQVMGKAAARVNDSLSCGCKLLPKQSLVNQG	87
ab736	M	A4U85_11220	MASPYITIGCPTTGGGQVISGNSAFLIDGIAIACVGDKATCPAHKTVSTIVSGDPNMQVMGKAAARVNDSLSCGCKLLPKQSLVNQG	87
AbH12O-A2	M	LX00_06455	MASPYITIGCPTTGGGQVISGNSAFLIDGIAIACVGDKATCPAHKTVSTIVSGDPNMQVMGKAAARVNDSLSCGCKLLPKQSLVNQG	87
AbPK1	M	CTI08_14170	MASPYITIGCPTTGGGQVISGNSAFLIEGIAIACVGDKATCPAHKTVSTIVSGDPNMQVMGKAAARVNDSLSCGCKLLPKQSLVNQG	87
AC29	M	BL01_13225	MASPYITIGCPTTGGGQVISGNSAFLIEGIAIACVGDKATCPAHKTVSTIVSGDPNMQVMGKAAARVNDSLSCGCKLLPKQSLVNQG	87
AC30	M	B856_02560	MASPYITIGCPTTGGGQVISGNSAFLIEGIAIACVGDKATCPAHKTVSTIVSGDPNMQVMGKAAARVNDSLSCGCKLLPKQSLVNQG	87
ACICU	M	ACICU_01306	MASPYITIGCPTTGGGQVISGNSAFLIEGIAIACVGDKATCPAHKTVSTIVSGDPNMQVMGKAAARVNDSLSCGCKLLPKQSLVNQG	87
AF-401	M	BS064_13470	MASPYITIGCPTTGGGQVISGNSAFLIDGIAIACVGDKATCPAHKTVSTIVSGDPNMQVMGKAAARVNDSLSCGCKLLPKQSLVNQG	87
AF-673	M	BS065_11870	MASPYITIGCPTTGGGQVISGNSAFLIEGIAIACVGDKATCPAHKTVSTIVSGDPNMQVMGKAAARVNDSLSCGCKLLPKQSLVNQG	87
AR_0056	M	C7R87_0886	MASPYITIGCPTTGGGQVISGNSAFLIEGIAIACVGDKATCPAHKTVSTIVSGDPNMQVMGKAAARVNDSLSCGCKLLPKQSLVNQG	87
AR_0063	M	AM442_09945	MASPYITIGCPTTGGGQVISGNSAFLIDGIAIACVGDKATCPAHKTVSTIVSGDPNMQVMGKAAARVNDSLSCGCKLLPKQSLVNQG	87
AR_0078	M	AM457_11060	MASPYITIGCPTTGGGQVISGNSAFLIEGIAIACVGDKATCPAHKTVSTIVSGDPNMQVMGKAAARVNDSLSCGCKLLPKQSLVNQG	87
AR_0083	M	AM462_07235	MASPYITIGCPTTGGGQVISGNSAFLIEGIAIACVGDKATCPAHKTVSTIVSGDPNMQVMGKAAARVNDSLSCGCKLLPKQSLVNQG	87
AR_0088	M	AM467_07435	MASPYITIGCPTTGGGQVISGNSAFLIEGIAIACVGDKATCPAHKTVSTIVSGDPNMQVMGKAAARVNDSLSCGCKLLPKQSLVNQG	87
AR_0101	M	AM480_14090	MASPYITIGCPTTGGGQVISGNSAFLIDGIAIACVGDKATCPAHKTVSTIVSGDPNMQVMGKAAARVNDSLSCGCKLLPKQSLVNQG	87
ATCC17978-mff	M	ACX60_11630	MASPYITIGCPTTGGGQVISGNSAFLIDGIAIACVGDKATCPAHKTVSTIVSGDPNMQVMGKAAARVNDSLSCGCKLLPKQSLVNQG	87
ATCC19606	M	HMPREF0010_01115	MASPYITIGCPTTGGGQVISGNSAFLIDGIAIACVGDKATCPAHKTVSTIVSGDPNMQVMGKAAARVNDSLSCGCKLLPKQSLVNQG	87
AYE	M	ABAYE2405	MASPYITIGCPTTGGGQVISGNSAFLIEGIAIACVGDKATCPAHKTVSTIVSGDPNMQVMGKAAARVNDSLSCGCKLLPKQSLVNQG	87
AYP-A2	M	AYP_001385	MASPYITIGCPTTGGGQVISGNSAFLIEGIAIACVGDKATCPAHKTVSTIVSGDPNMQVMGKAAARVNDSLSCGCKLLPKQSLVNQG	87
BJAB07104	M	BJAB07104_01469	MASPYITIGCPTTGGGQVISGNSAFLIEGIAIACVGDKATCPAHKTVSTIVSGDPNMQVMGKAAARVNDSLSCGCKLLPKQSLVNQG	87
BJAB0715	M	BJAB0715_01490	MASPYITIGCPTTGGGQVISGNSAFLIEGIAIACVGDKATCPAHKTVSTIVSGDPNMQVMGKAAARVNDSLSCGCKLLPKQSLVNQG	87
BJAB0868	M	BJAB0868_01419	MASPYITIGCPTTGGGQVISGNSAFLIEGIAIACVGDKATCPAHKTVSTIVSGDPNMQVMGKAAARVNDSLSCGCKLLPKQSLVNQG	87
CBA7	M	B7L36_10135	MASPYITIGCPTTGGGQVISGNSAFLIEGIAIACVGDKATCPAHKTVSTIVSGDPNMQVMGKAAARVNDSLSCGCKLLPKQSLVNQG	87
CIP70.10	M	ABCIP7010_1304	MASPYITIGCPTTGGGQVISGNSAFLIEGIAIACVGDKATCPAHKTVSTIVSGDPNMQVMGKAAARVNDSLSCGCKLLPKQSLVNQG	87
CMC-CR-MDR-Ab4	M	AOT16_11640	MASPYITIGCPTTGGGQVISGNSAFLIEGIAIACVGDKATCPAHKTVSTIVSGDPNMQVMGKAAARVNDSLSCGCKLLPKQSLVNQG	87
CMC-CR-MDR-Ab66	M	AOT18_11620	MASPYITIGCPTTGGGQVISGNSAFLIEGIAIACVGDKATCPAHKTVSTIVSGDPNMQVMGKAAARVNDSLSCGCKLLPKQSLVNQG	87
CMC-MDR-Ab59	M	AOT17_11625	MASPYITIGCPTTGGGQVISGNSAFLIEGIAIACVGDKATCPAHKTVSTIVSGDPNMQVMGKAAARVNDSLSCGCKLLPKQSLVNQG	87
D36	M	AN415_02481	MASPYITIGCPTTGGGQVISGNSAFLIEGIAIACVGDKATCPAHKTVSTIVSGDPNMQVMGKAAARVNDSLSCGCKLLPKQSLVNQG	87
DU202	M	DU202_01520	MASPYITIGCPTTGGGQVISGNSAFLIEGIAIACVGDKATCPAHKTVSTIVSGDPNMQVMGKAAARVNDSLSCGCKLLPKQSLVNQG	87
HRAB-85	M	BKJ37_11840	MASPYITIGCPTTGGGQVISGNSAFLIEGIAIACVGDKATCPAHKTVSTIVSGDPNMQVMGKAAARVNDSLSCGCKLLPKQSLVNQG	87
HWAB8	M	B7L46_15920	MASPYITIGCPTTGGGQVISGNSAFLIEGIAIACVGDKATCPAHKTVSTIVSGDPNMQVMGKAAARVNDSLSCGCKLLPKQSLVNQG	87
IOMTU433	M	IOMTU433_2394	MASPYITIGCPTTGGGQVISGNSAFLIEGIAIACVGDKATCPAHKTVSTIVSGDPNMQVMGKAAARVNDTLSCGCKLLPKQSLVNQG	87
KAB01	M	KAB01_01457	MASPYITIGCPTTGGGQVISGNSAFLIEGIAIACVGDKATCPAHKTVSTIVSGDPNMQVMGKAAARVNDSLSCGCKLLPKQSLVNQG	87
KAB03	M	KAB03_02135	MASPYITIGCPTTGGGQVISGNSAFLIEGIAIACVGDKATCPAHKTVSTIVSGDPNMQVMGKAAARVNDSLSCGCKLLPKQSLVNQG	87
MDR-TJ	M	ABTJ_02404	MASPYITIGCPTTGGGQVISGNSAFLIEGIAIACVGDKATCPAHKTVSTIVSGDPNMQVMGKAAARVNDSLSCGCKLLPKQSLVNQG	87
MDR-ZJ06	M	ABZJ_01464	MASPYITIGCPTTGGGQVISGNSAFLIEGIAIACVGDKATCPAHKTVSTIVSGDPNMQVMGKAAARVNDSLSCGCKLLPKQSLVNQG	87
NCGM237	M	AB237_RS12605	MASPYITIGCPTTGGGQVISGNSAFLIEGIAIACVGDKATCPAHKTVSTIVSGDPNMQVMGKAAARVNDSLSCGCKLLPKQSLVNQG	87
R2090	M	ABR2090_2270	MASPYITIGCPTTGGGQVISGNSAFLIEGIAIACVGDKATCPAHKTVSTIVSGDPNMQVMGKAAARVNDSLSCGCKLLPKQSLVNQG	87
R2091	M	ABR2091_1303	MASPYITIGCPTTGGGQVISGNSAFLIEGIAIACVGDKATCPAHKTVSTIVSGDPNMQVMGKAAARVNDSLSCGCKLLPKQSLVNQG	87
SDF	M	ABSDF2241	MASPYIMIGCPTTGGGQVISGNSAFLIEGITIACVGDKATCPAHKTVSTIVSGDPNMQVMGKAAARVNDSLSCGCKLLPKQSLVNQG	87
SSA6	M	B7L40_12690	MASPYITIGCPTTGGGQVISGNSAFLIEGIAIACVGDKATCPAHKTVSTIVSGDPNMQVMGKAAARVNDSLSCGCKLLPKQSLVNQG	87
TCDC-AB0715	M	ABTW07_1478	MASPYITIGCPTTGGGQVISGNSAFLIEGIAIACVGDKATCPAHKTVSTIVSGDPNMQVMGKAAARVNDSLSCGCKLLPKQSLVNQG	87
TYTH-1	M	M3Q_1675	MASPYITIGCPTTGGGQVISGNSAFLIEGIAIACVGDKATCPAHKTVSTIVSGDPNMQVMGKAAARVNDSLSCGCKLLPKQSLVNQG	87
USA15	M	B7L41_08785	MASPYITIGCPTTGGGQVISGNSAFLIEGIAIACVGDKATCPAHKTVSTIVSGDPNMQVMGKAAARVNDSLSCGCKLLPKQSLVNQG	87
USA2	M	B7L39_02770	MASPYITIGCPTTGGGQVISGNSAFLIEGIAIACVGDKATCPAHKTVSTIVSGDPNMQVMGKAAARVNDSLSCGCKLLPKQSLVNQG	87
WCHAB005078	M	C6N18_07430	MASPYITIGCPTTGGGQVISGNSAFLIEGIAIACVGDKATCPAHKTVSTIVSGDPNMQVMGKAAARVNDSLSCGCKLLPKQSLVNQG	87
WCHAB005133	M	C5B74_11990	MASPYITIGCPTTGGGQVISGNSAFLIEGIAIACVGDKATCPAHKTVSTIVSGDPNMQVMGKAAARVNDSLSCGCKLLPKQSLVNQG	87
WKA02	M	B7L35_04870	MASPYITIGCPTTGGGQVISGNSAFLIDGIAIACVGDKATCPAHKTVSTIVSGDPNMQVMGKAAARVNDSLSCGCKLLPKQSLVNQG	87
XDR-BJ83	M	BS615_11705	MASPYITIGCPTTGGGQVISGNSAFLIEGIAIACVGDKATCPAHKTVSTIVSGDPNMQVMGKAAARVNDSLSCGCKLLPKQSLVNQG	87
XH386	M	TE32_12130	MASPYITIGCPTTGGGQVISGNSAFLIEGIAIACVGDKATCPAHKTVSTIVSGDPNMQVMGKAAARVNDSLSCGCKLLPKQSLVNQG	87
XH856	M	AYR70_11420	MASPYITIGCPTTGGGQVISGNSAFLIEGIAIACVGDKATCPAHKTVSTIVSGDPNMQVMGKAAARVNDSLSCGCKLLPKQSLVNQG	87
XH857	M	AYR69_11530	MASPYITIGCPTTGGGQVISGNSAFLIEGIAIACVGDKATCPAHKTVSTIVSGDPNMQVMGKAAARVNDSLSCGCKLLPKQSLVNQG	87
XH858	M	AZE33_07790	MASPYITIGCPTTGGGQVISGNSAFLIEGIAIACVGDKATCPAHKTVSTIVSGDPNMQVMGKAAARVNDSLSCGCKLLPKQSLVNQG	87
XH859	M	AYR68_06470	MASPYITIGCPTTGGGQVISGNSAFLIEGIAIACVGDKATCPAHKTVSTIVSGDPNMQVMGKAAARVNDSLSCGCKLLPKQSLVNQG	87
XH860	M	AYR67_11615	MASPYITIGCPTTGGGQVISGNSAFLIEGIAIACVGDKATCPAHKTVSTIVSGDPNMQVMGKAAARVNDSLSCGCKLLPKQSLVNQG	87
ZW85-1	M	P795_10860	MASPYITIGCPTTGGGQVISGNSAFLIEGIAIACVGDKATCPAHKTVSTIVSGDPNMQVMGKAAARVNDSLSCGCKLLPKQSLVNQG	87
